# Supplementary material
Source: PubMed Central journal article supplement (PMC4734558)
Supplement: supp_pp.15.01246_PP2015-01246R1_Supplemental_Material.pdf [file supp_pp.15.01246_PP2015-01246R1_Supplemental_Material.pdf]

1 **SUPPLEMENTAL MATERIAL**

2  
3  
4  
5

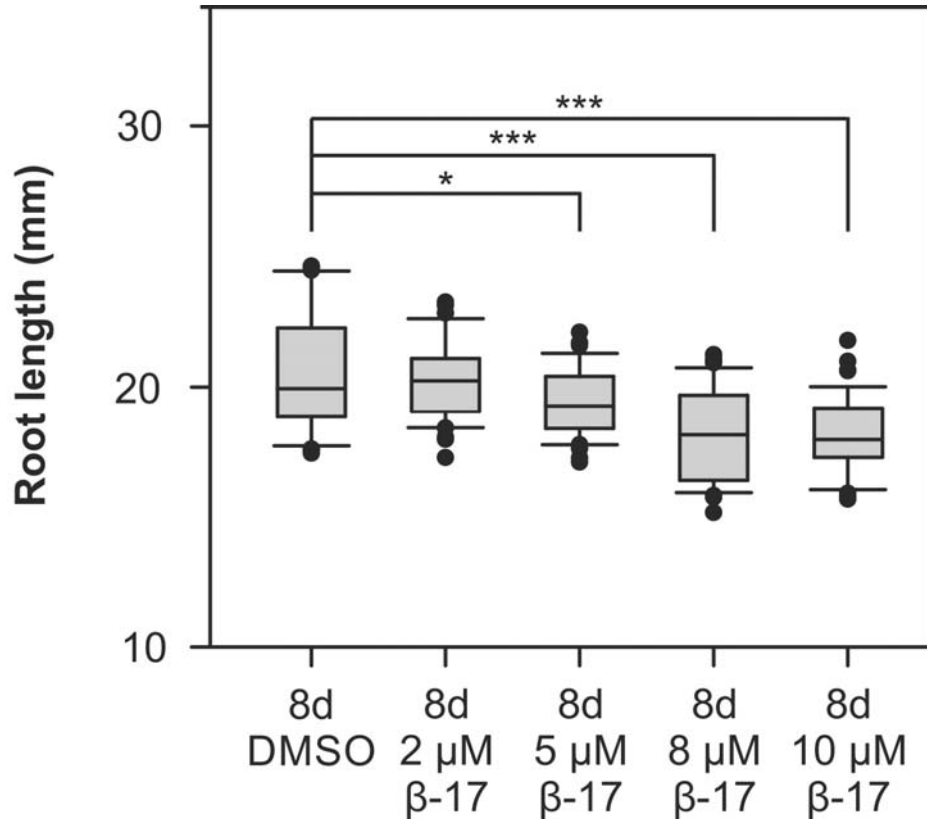

6  
7  
8

9 **Supplemental Figure S1.** Effect of 17-β-estradiol treatment on root growth (in the Purdue University).  
10 Root length (millimeters) of Col-0 plants germinated on DMSO solvent control plates or 17-β-estradiol  
11 plates (2 μM, 5 μM, 8 μM, 10 μM) and grown for 8, 11 or 13 days. Asterisks indicate significant  
12 difference (Mann-Whitney U test): \*=P<0.05; \*\*= P<0.01; \*\*\*= P<0.001.  
13

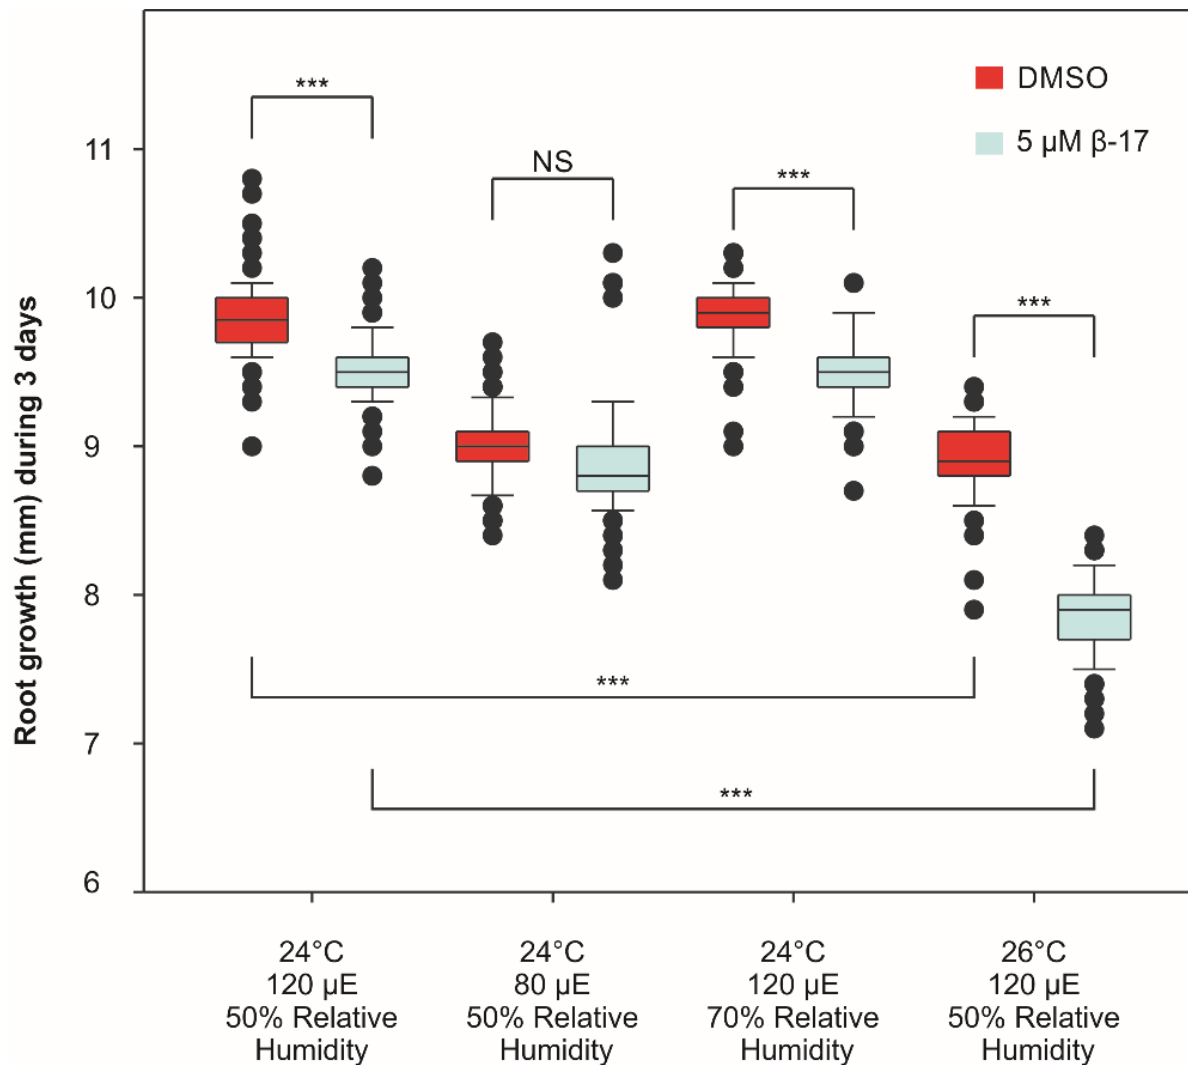

14

15

16 **Supplemental Figure S2.** Effect of growth conditions (temperature, light intensity and relative  
 17 humidity) on 17- $\beta$ -estradiol-mediated root growth inhibition. Col-0 seedlings were grown on  $\frac{1}{4}$  MS  
 18 media for 6 days and transferred on DMSO (red) or 5  $\mu$ M 17- $\beta$ -estradiol (cyan) plates. Root growth (in  
 19 millimeters) was measured 72 hours after transfer. Box-plots show the results of three biological  
 20 repeats with 32 samples each. Asterisks indicate significant difference (ANOVA with Turkey's *post hoc*  
 21 test): \*\*\*= P<0.001; NS= Not Significant; microEinstein,  $\mu$ E. These experiments were performed in the  
 22 University of Maryland.

23

24 **Supplemental Table S1.** Primers to amplify and clone the inducible promoters

| Entry clone       | Primers (left, top; right, bottom)                                                                                                                                                                                                                                                                                                                                |
|-------------------|-------------------------------------------------------------------------------------------------------------------------------------------------------------------------------------------------------------------------------------------------------------------------------------------------------------------------------------------------------------------|
| p1R4-p6xUAS:XVE   | Cloning explained in Materials and Methods.<br><b>G1090F-attB4:</b> ggggacaacttgtatagaaaagttgatctgatagtttaactgaaggcgggaaacg;<br><b>rbcTR-not1:</b> tttgcgccgcggttgggatgtttactcctcatattaactcggtc;<br><b>nostF-not1:</b> atatgcgccgcacgttcaaacatttggcaataaagttcttaagattg;<br><b>laxR-attB1:</b> ggggactgctttttgtacaaactgtgctagagtcgactagcttcagcg                    |
| p1R4-pAHP6:XVE    | aaaactcgagcacggggcgcaaagaagcatgac<br>aaaactcgagccacaacggcacaccgctctg                                                                                                                                                                                                                                                                                              |
| p1R4-pANT:XVE     | p226GII-pANT plasmid was digested with <i>Xho</i> 1 and <i>Sma</i> 1 and the subsequent 5137bp <i>ANT</i> promoter was cloned into <i>Xho</i> 1- <i>Sna</i> B1-digested p1R4-pML:XVE to obtain p1R4-pANT:XVE                                                                                                                                                      |
| p1R4-pAPL:XVE     | cgatcgatttatcgaatttagtgtt<br>tctctctctctctctctgactctc                                                                                                                                                                                                                                                                                                             |
| p1R4-pAtSUC2:XVE  | tataggcgcgcttcaaggccactataaatttctca<br>tataggtaccatttgacaaaccaagaaagtaaga                                                                                                                                                                                                                                                                                         |
| p1R4-pCALS3:XVE   | ctcagtcgacgatttgagctca<br>ttgtctaccctataacctccag                                                                                                                                                                                                                                                                                                                  |
| p1R4-pCCS52A1:XVE | cgaccggtcgaagaagaactgcagctct<br>ccgtacgtatggtttttttttgtgac                                                                                                                                                                                                                                                                                                        |
| p1R4-pCO2:XVE     | tataggtaccgggccccctcgag<br>tataagcgctaaaactctgttcattattgtcaaatcctttggca                                                                                                                                                                                                                                                                                           |
| p1R4-pCYP79B3:XVE | taggtaccgacctcgatgggctcta<br>taggtacctgcaaggaagaaggagaagg                                                                                                                                                                                                                                                                                                         |
| p1R4-pG1090:XVE   | Cloning explained in Materials and Methods.<br><b>G1090F-attB4:</b> ggggacaacttgtatagaaaagttgatctgatagtttaactgaaggcgggaaacg;<br><b>rbcTR-not1:</b> tttgcgccgcggttgggatgtttactcctcatattaactcggtc;<br><b>nostF-not1:</b> atatgcgccgcacgttcaaacatttggcaataaagttcttaagattg;<br><b>laxR-attB1:</b> ggggactgctttttgtacaaactgtgctagagtcgactagcttcagcg                    |
| p1R4-pGCI:XVE     | tataaccgtaaacaaaatggtgcaaca<br>tatactcgagatttcttgagtagtattt                                                                                                                                                                                                                                                                                                       |
| p1R4-pIRX8:XVE    | cgaccggtacgagctgactgtgctgatgag<br>ccgtacgtacgaagaggaaactggatcttacg                                                                                                                                                                                                                                                                                                |
| p1R4-pLFY:XVE     | cgggcgccggatccattttcgaagg<br>cgaccggtctattttctctctctatcac                                                                                                                                                                                                                                                                                                         |
| p1R4-pLexA        | By recombining into pDONR 221. Amplified with primers:<br>ggggacaacttgtatagaaaagttgtagctgggctcgaggtcg<br>ggggactgctttttgtacaaactgtgctagagtcgactagcttcagcg                                                                                                                                                                                                         |
| p1R4-pML:XVE      | Cloning explained in Materials and Methods. <b>MLF-attB4:</b><br>ggggacaacttgtatagaaaagttggcgccatcgataccggtgtaccctcgagtacgtaccaattccggcggaatga;<br><b>rbcTR-not1:</b> tttgcgccgcggttgggatgtttactcctcatattaactcggtc; <b>nostF-not1:</b><br>atatgcgccgcacgttcaaacatttggcaataaagttcttaagattg; <b>laxR-attB1:</b><br>ggggactgctttttgtacaaactgtgctagagtcgactagcttcagcg |
| p1R4-pRCH1:XVE    | tattaccggtcgtcagaatccaagaaagctttttcagtacaccac<br>tattctcgagtttcttgcatttggctctcaaatccaaaacaagc                                                                                                                                                                                                                                                                     |
| P1R4-pS17:XVE     | atatggcgcgctctggattagcgactaaggcta                                                                                                                                                                                                                                                                                                                                 |

|                 |                                                                                                                                                                                                                                                                                                                                                       |    |
|-----------------|-------------------------------------------------------------------------------------------------------------------------------------------------------------------------------------------------------------------------------------------------------------------------------------------------------------------------------------------------------|----|
|                 | taatctcgagcttaatgaccggttaaaattgtt                                                                                                                                                                                                                                                                                                                     | 25 |
| p1R4-pSCR:XVE   | aaaactcgagatgaaaagtggaaatttacctggaagtccg<br>aaaactcgaggagattgaagggttgtggtcgtg                                                                                                                                                                                                                                                                         | 26 |
| p1R4-pTHE:XVE   | cgaccggtcaccgttccaaggataac<br>ccgtacgtagaaccctaaaacccaattgg                                                                                                                                                                                                                                                                                           |    |
| p1R4-pTMO5:XVE  | ttggcgcgccgtgaaacgtcgtgtgggcttc<br>ttgtacctttggtttttggttttagttttgg                                                                                                                                                                                                                                                                                    |    |
| p1R4-pUBQ10:XVE | cggggtaccagtctagctcaacagagct<br>ggactcgagggtattgtttatagaagaagaag                                                                                                                                                                                                                                                                                      |    |
| p1R4-pWER:XVE   | aaaactcgagtgaaaggcggccaatac<br>aaaactcgagctttttgttcttgaatgatagacgagagag                                                                                                                                                                                                                                                                               |    |
| p1R4-pWOL:XVE   | Cloning explained in Materials and Methods.<br><b>G1090F-attB4</b> : ggggacaactttgtatagaaaagttgatctgatagtttaaactgaaggcgggaaacg;<br><b>rbcTR-not1</b> : tttgcgccgcglttgggatgtttactcctcatattaactcggtc;<br><b>nostF-not1</b> : atatcgccgcgcatcgtcaaacattggcaataaaagttcttaagattg;<br><b>laxR-attB1</b> : ggggactgctttttgtacaaactgtgctagagtcgactagcttcagcg |    |
| p1R4-pWOX5:XVE  | taggtaccccctgtagcgaactaggaa<br>taggtacctttacgttttagggcctgtg                                                                                                                                                                                                                                                                                           |    |
| p1R4-pZCP4-XVE  | cgaccggtctcaagacatttctactatagac<br>cgctcgagtgtgtgtgtgtgtg                                                                                                                                                                                                                                                                                             |    |
